# Supplementary material for: Efficacy and Synergistic Potential of Cinnamon (Cinnamomum zeylanicum) and Clove (Syzygium aromaticum L. Merr. & Perry) Essential Oils to Control Food-Borne Pathogens in Fresh-Cut Fruits
Source: MDPI journal article supplement (doi:10.3390/antibiotics13040319), 2024-03-31
Supplement: s1 [file s1]

# Efficacy and synergistic potential of Cinnamon (*Cinnamomum zeylanicum*) and Clove (*Syzygium aromaticum* L. Merr. & Perry) essential oils to control food-borne pathogens in fresh-cut fruits

Ramona Iseppi <sup>1</sup>, Eleonora Truzzi<sup>2</sup>, Carla Sabia <sup>1</sup> and Patrizia Messi <sup>\*1</sup>

<sup>1</sup> Department of Life Sciences, University of Modena and Reggio Emilia, Via G. Campi 287, 41125 Modena, Italy; ramona.iseppi@unimore.it (R.I.); carla.sabia@unimore.it (C.S.)

<sup>2</sup> Department of Chemical and Geological Sciences, University of Modena and Reggio Emilia, Via G. Campi 103, 41125 Modena, Italy; eleonora.truzzi@unimore.it (E.T.);

\* Correspondence: patrizia.messi@unimore.it (P.M.)

Tel.: +39-059-205-5615 (P.M.)

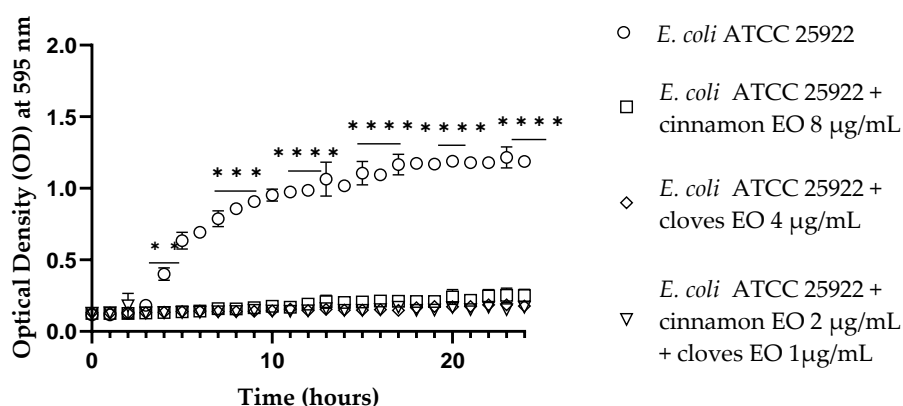

**Figure S1:** Time-kill studies of cinnamon and clove EOs alone and in combination against *Escherichia coli* ATCC 25922 viable cells. p-values of <0.05 (\*), p <0.01 (\*\*), p <0.001 (\*\*\*) and p <0.0001 (\*\*\*\*) were considered significant by t-test and ANOVA with Bonferroni correction. Results are expressed as mean  $\pm$  SD of the three determinations (error bar = S.D.; n = 3).

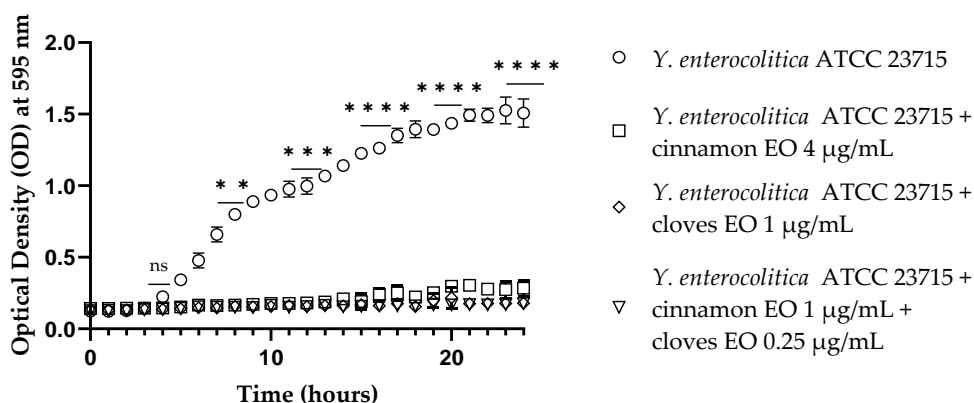

**Figure S2:** Time-kill studies of cinnamon and clove EOs alone and in combination against *Yersinia enterocolitica* ATCC 23715 viable cells. p-values of <0.05 (\*), p <0.01 (\*\*), p <0.001 (\*\*\*) and p <0.0001 (\*\*\*\*) were considered significant by t-test and ANOVA with Bonferroni correction. Results are expressed as mean  $\pm$  SD of the three determinations (error bar = S.D.; n = 3).

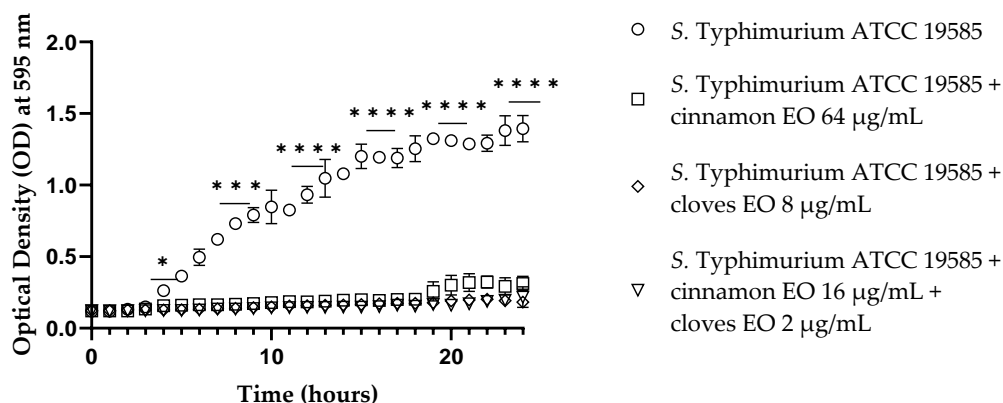

**Figure S3:** Time-kill studies of cinnamon and clove EOs alone and in combination against *Salmonella* Typhimurium ATCC 19585 viable cells. p-values of <0.05 (\*), p <0.01 (\*\*), p <0.001 (\*\*\*) and p <0.0001 (\*\*\*\*) were considered significant by t-test and ANOVA with Bonferroni correction. Results are expressed as mean  $\pm$  SD of the three determinations (error bar = S.D.; n = 3).

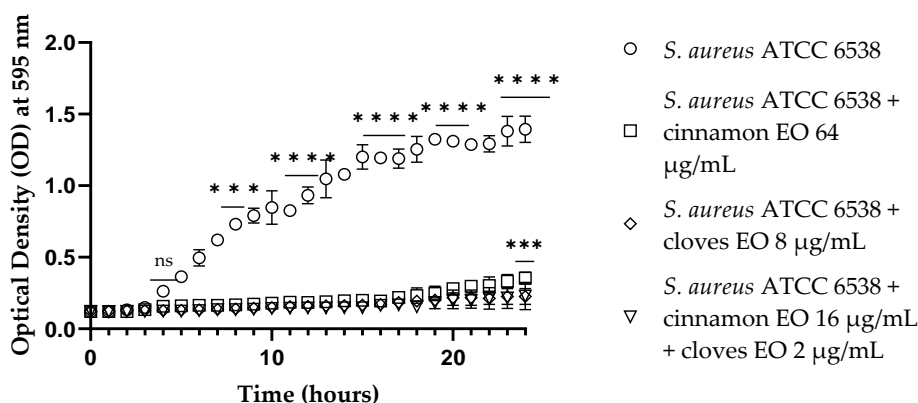

**Figure S4:** Time-kill studies of cinnamon and clove EOs alone and in combination against *Staphylococcus aureus* ATCC 6538 viable cells. p-values of <0.05 (\*), p <0.01 (\*\*), p <0.001 (\*\*\*) and p <0.0001 (\*\*\*\*) were considered significant by t-test and ANOVA with Bonferroni correction. Results are expressed as mean  $\pm$  SD of the three determinations (error bar = S.D.; n = 3).
